# Supplementary material for: Effect of Magnetic Heating on Stability of Magnetic Colloids
Source: MDPI journal article supplement (doi:10.3390/nano12173064), 2022-09-03
Supplement: s1 [file s1]

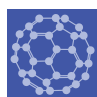

## Article

## Effect of Magnetic Heating on Stability of Magnetic Colloids

Andrzej Drzewiński , Maciej Marć , Wiktor W. Wolak and Mirosław R. Dudek

Institute of Physics, University of Zielona Góra, ul. Szafrana 4a, 65-069 Zielona Góra, Poland

\* Correspondence: a.drzewinski@if.uz.zgora.pl

## S1. Supplementary Materials

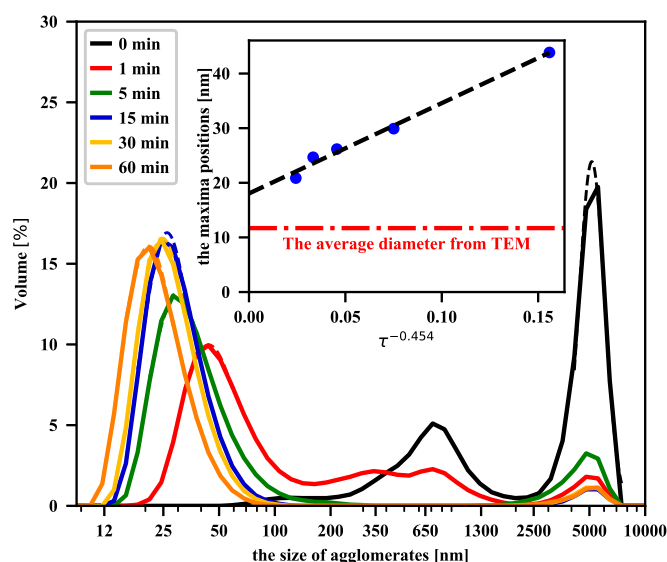

**Figure S1.** The volume-based size distribution of the agglomerates of the nanoparticles dispersed in an aqueous suspension with pH = 11.5 for different sonication durations. An interpolation of the distribution function near their maximum is marked with a dashed line. The inset suggests a power-law trend of the dependence of the mean hydrodynamic diameter on the duration of the sonication process, where the HD offset value is 17.8 nm. The dimensionless quantity  $\tau$  is defined as (the sonication time)/(1 min).

**Table S1.** Slopes and SAR values of nanoparticles for sonication durations as in panel (a) in Figure 4.

| Sonication Time [min] | Slope [°C/min] | SAR [W/g] |
|-----------------------|----------------|-----------|
| 0                     | 1.55           | 16.61     |
| 1                     | 3.09           | 33.14     |
| 5                     | 4.39           | 47.06     |
| 15                    | 5.15           | 55.19     |
| 30                    | 4.87           | 52.15     |
| 60                    | 5.40           | 57.88     |
| 120                   | 5.34           | 57.24     |

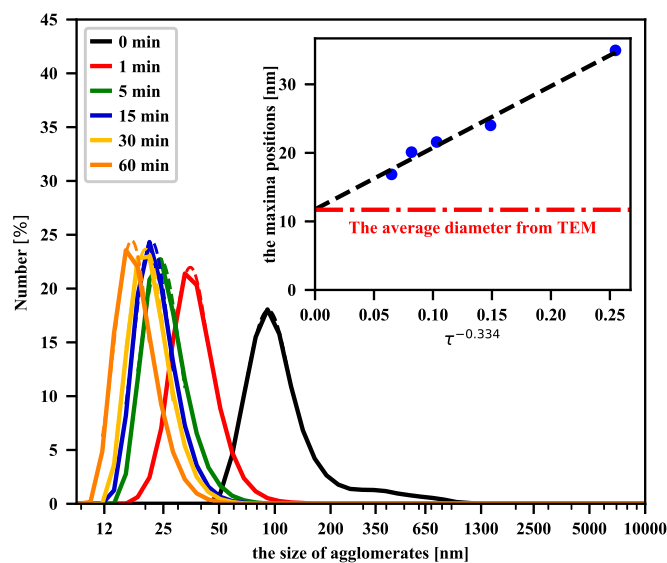

**Figure S2.** The number-based size distribution of the agglomerates of the nanoparticles dispersed in an aqueous suspension with pH = 11.5 for different sonication durations. An interpolation of the distribution function near their maximum is marked with a dashed line. The inset suggests a power-law trend of the dependence of the mean hydrodynamic diameter on the duration of the sonication process, where the HD offset value is 11.5 nm. The dimensionless quantity  $\tau$  is defined as (the sonication time)/(1 min).

**Table S2.** SAR values of nanoparticles for sonication durations as in panel (b) in Figure 4. The symbol  $\Delta$ SAR means the difference between the highest and the lowest value of the SAR coefficient for a given sonication time.

| Sonication Time [min] | SAR [W/g] | SAR <sub>mean</sub> [W/g] | $\Delta$ SAR | $\Delta$ SAR/SAR <sub>mean</sub> [%] |
|-----------------------|-----------|---------------------------|--------------|--------------------------------------|
| 0                     | 25.86     | 23.12                     | 5.16         | 22.3                                 |
|                       | 20.71     |                           |              |                                      |
|                       | 21.34     |                           |              |                                      |
|                       | 22.19     |                           |              |                                      |
|                       | 25.51     |                           |              |                                      |
| 15                    | 48.55     | 45.67                     | 4.81         | 10.5                                 |
|                       | 43.74     |                           |              |                                      |
|                       | 47.14     |                           |              |                                      |
|                       | 45.09     |                           |              |                                      |
|                       | 43.81     |                           |              |                                      |
| 120                   | 51.52     | 53.53                     | 4.24         | 7.9                                  |
|                       | 53.35     |                           |              |                                      |
|                       | 53.50     |                           |              |                                      |
|                       | 55.76     |                           |              |                                      |
